# Supplementary material
Source: MDPI journal article supplement (https://www.mdpi.com/2227-9717/9/7/1110)

## Supplementary material\_Processes-1270424

The algorithm developed for this study for designing and realizing the spatial structure is a complex one, difficult to be presented in detail.

Grasshopper, as a visual programming, has a specific way to define and express the flow of information.

The Grasshopper algorithm developed by the authors (presented in the image below) is in essence a flowchart, which would allow one to follow exactly each component (function) and their dependencies.

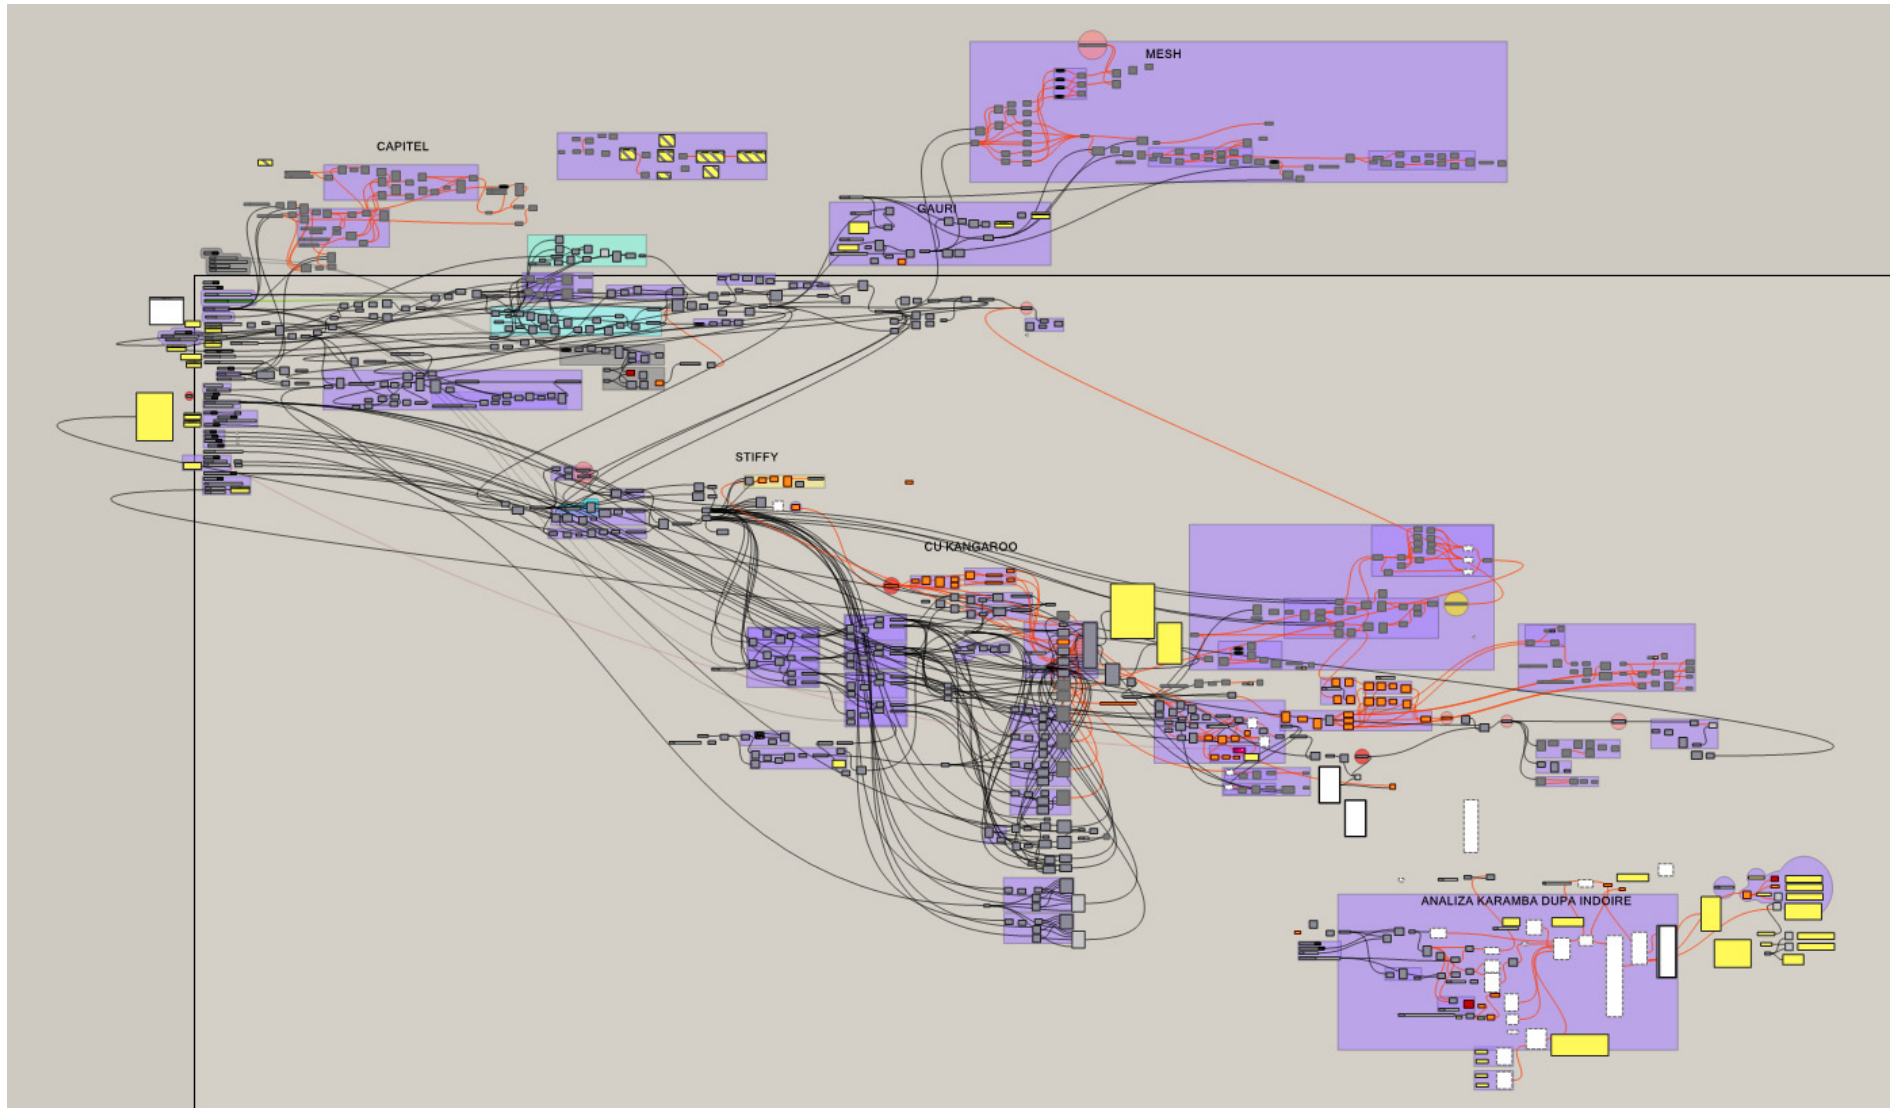

The image above is difficult to be exported as a hi-res image due to its complexity. A sample image of a very small fraction of the algorithm (hi-res image) is presented below.

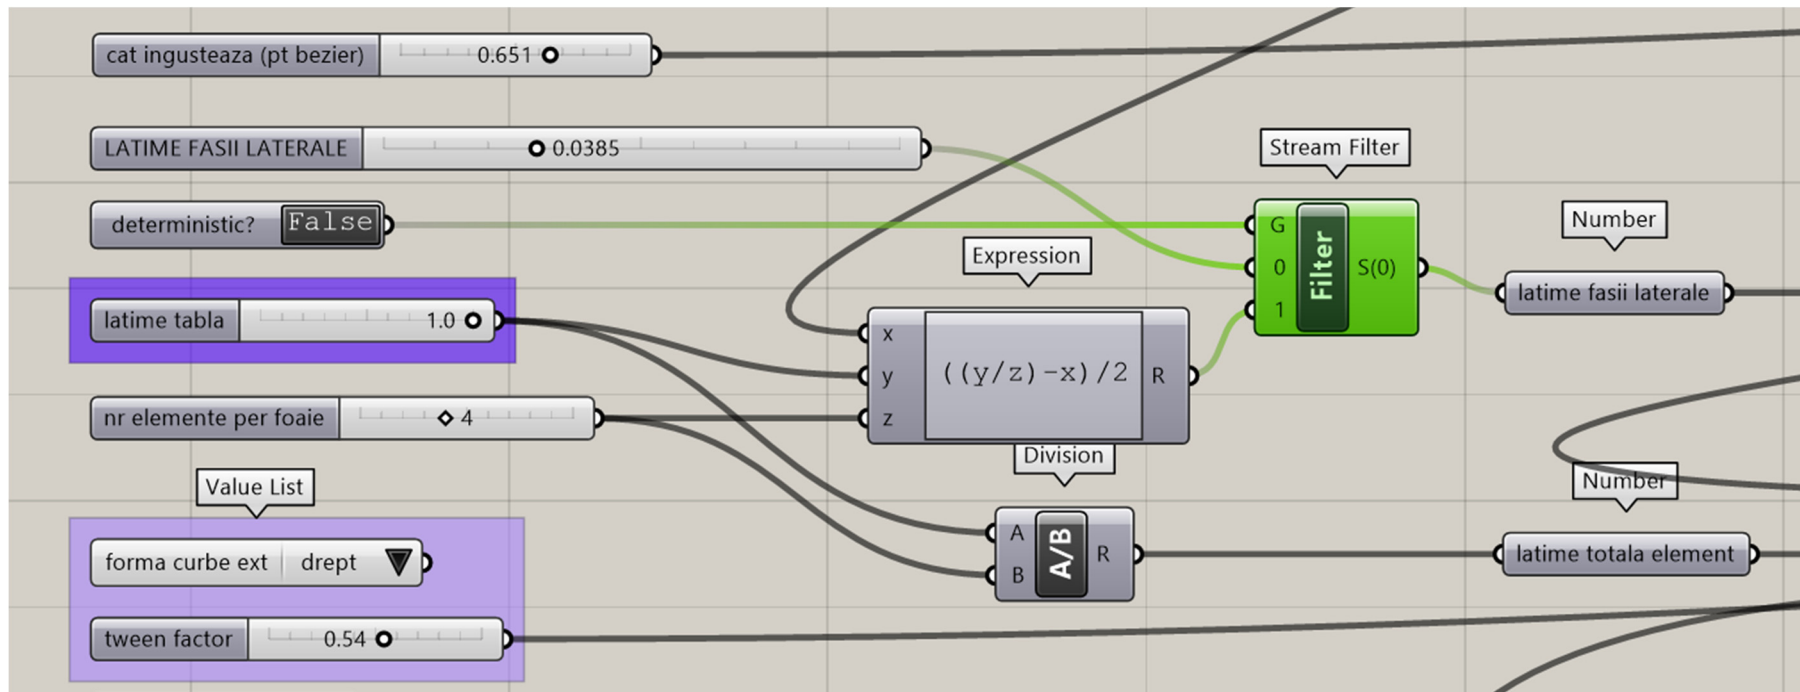

A general high-level diagram showing how all parts are interconnected is presented below:

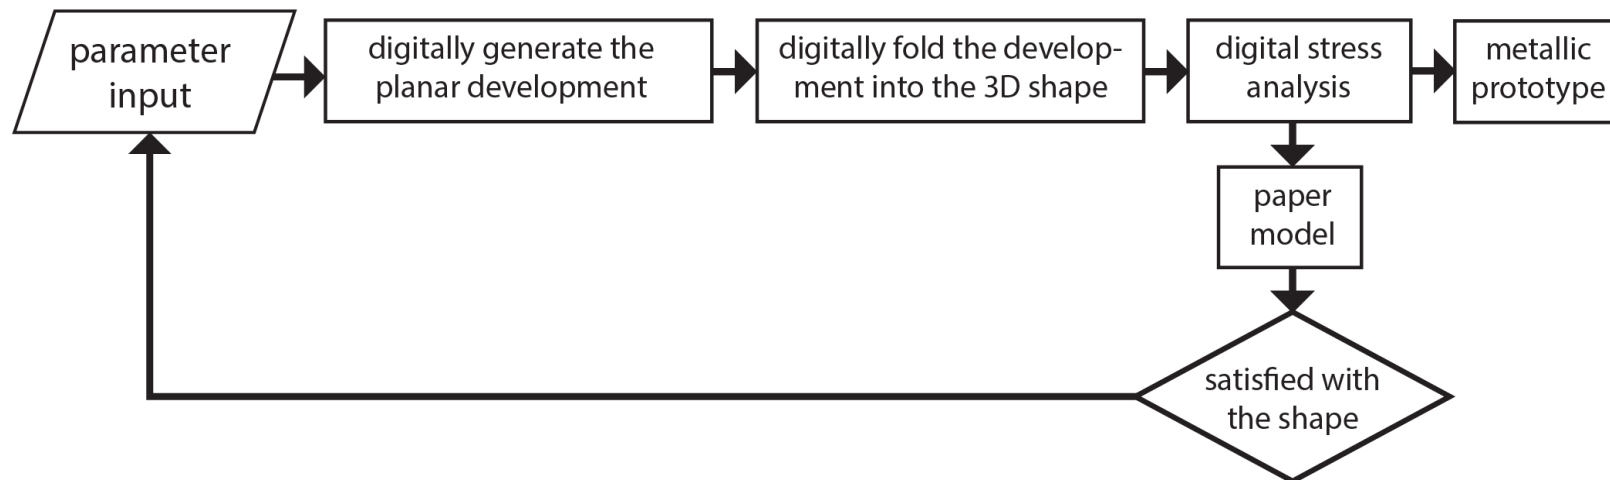

Supplement: s1 [file s1]
